# Supplementary material for: Community Pharmacists’ Views and Practices Regarding Natural Health Products Sold in Community Pharmacies
Source: PLOS journal article supplement (doi:10.1371/journal.pone.0163450), 2016-09-23
Supplement: S3 (10.1371/journal.pone.0163450.s003) [file journal.pone.0163450.s003]

### Influence of frequency of NHP recommendations on counselling practices

|                                                                                                                  |              | In what circumstances do you provide counselling to clients regarding the safety and efficacy of NHPs? Check all that apply. |                                    |                                                                                             |                                                                  |                                                                                        |                         | Total          |
|------------------------------------------------------------------------------------------------------------------|--------------|------------------------------------------------------------------------------------------------------------------------------|------------------------------------|---------------------------------------------------------------------------------------------|------------------------------------------------------------------|----------------------------------------------------------------------------------------|-------------------------|----------------|
|                                                                                                                  |              | When I recommend a NHP to a client                                                                                           | When a client inquires about a NHP | When a client is picking up a NHP prescribed or recommended by another health care provider | When a client requires assistance locating a NHP in the pharmacy | I have never provided counselling to clients regarding the safety and efficacy of NHPs | Other (please specify): |                |
| On a scale of 1 to 5, with 5 being very often and 1 being never, how regularly do you recommend NHPs to clients? | 1- Never     | 36.36%                                                                                                                       | 72.73%                             | 36.36%                                                                                      | 18.18%                                                           | 18.18%                                                                                 | 0.00%                   | 100.00%        |
|                                                                                                                  | 2-Rarely     | 97<br>85.09%                                                                                                                 | 106<br>92.98%                      | 59<br>51.75%                                                                                | 54<br>47.37%                                                     | 2<br>1.75%                                                                             | 4<br>3.51%              | 114<br>100.00% |
|                                                                                                                  | 3- Sometimes | 165<br>90.66%                                                                                                                | 168<br>92.31%                      | 138<br>75.82%                                                                               | 126<br>69.23%                                                    | 0<br>0.00%                                                                             | 2<br>1.10%              | 182<br>100.00% |
|                                                                                                                  | 4- Often     | 65<br>91.55%                                                                                                                 | 60<br>84.51%                       | 52<br>73.24%                                                                                | 47<br>66.20%                                                     | 0<br>0.00%                                                                             | 4<br>5.63%              | 71<br>100.00%  |
|                                                                                                                  | 5-Very Often | 21<br>91.30%                                                                                                                 | 20<br>86.96%                       | 19<br>82.61%                                                                                | 17<br>73.91%                                                     | 0<br>0.00%                                                                             | 1<br>4.35%              | 23<br>100.00%  |
|                                                                                                                  | Total        | 352<br>87.78%                                                                                                                | 362<br>90.27%                      | 272<br>67.83%                                                                               | 246<br>61.35%                                                    | 4<br>1.00%                                                                             | 11<br>2.74%             | 401<br>100.00% |

**p-value: 0.00**

NHPs recommended for concurrent use

|                                                                                       |          | What NHPs do you recommend most often? Check all that apply. |                   |               |                                  |               |               |               |               |               |               |                              |               |               |               |              |                      |               |                 |              |              |               |              |              |                |                                     |                         |
|---------------------------------------------------------------------------------------|----------|--------------------------------------------------------------|-------------------|---------------|----------------------------------|---------------|---------------|---------------|---------------|---------------|---------------|------------------------------|---------------|---------------|---------------|--------------|----------------------|---------------|-----------------|--------------|--------------|---------------|--------------|--------------|----------------|-------------------------------------|-------------------------|
|                                                                                       |          | Multivitamin/prenatal vitamin                                | Vitamin B complex | Vitamin B6    | Vitamin B12 (oral or sublingual) | Folic acid    | Vitamin C     | Vitamin D     | Calcium       | Magnesium     | Zinc          | Fish oil/omega-3 fatty acids | Melatonin     | Iron          | Ginseng       | Echinacea    | Homeopathic products | Probiotics    | St. John's wort | Cranberry    | Garlic       | Ginkgo biloba | Tea tree oil | Saw palmetto | Psyllium fiber | Weight loss/detoxification products | Other (please specify): |
| Have you recommended that a client use NHPs concurrently with conventional medicines? | Yes      | 248<br>73.16%                                                | 135<br>39.82%     | 36<br>10.62%  | 157<br>46.31%                    | 130<br>38.35% | 80<br>23.60%  | 283<br>83.48% | 275<br>81.12% | 122<br>35.99% | 43<br>12.68%  | 213<br>62.83%                | 187<br>55.16% | 188<br>55.46% | 18<br>5.31%   | 34<br>10.03% | 23<br>6.78%          | 234<br>69.03% | 11<br>3.24%     | 79<br>23.30% | 23<br>6.78%  | 15<br>4.42%   | 38<br>11.21% | 25<br>7.37%  | 144<br>42.48%  | 14<br>4.13%                         | 22<br>6.49%             |
|                                                                                       | No       | 26<br>63.41%                                                 | 14<br>34.15%      | 2<br>4.88%    | 13<br>31.71%                     | 9<br>21.95%   | 5<br>12.20%   | 27<br>65.85%  | 19<br>46.34%  | 5<br>12.20%   | 4<br>9.76%    | 14<br>34.15%                 | 21<br>51.22%  | 18<br>43.90%  | 0<br>0.00%    | 4<br>9.76%   | 4<br>9.76%           | 20<br>48.78%  | 1<br>2.44%      | 4<br>9.76%   | 0<br>0.00%   | 2<br>4.88%    | 4<br>9.76%   | 1<br>2.44%   | 12<br>29.27%   | 4<br>9.76%                          | 5<br>12.20%             |
|                                                                                       | Not Sure | 12<br>70.59%                                                 | 4<br>23.53%       | 0<br>0.00%    | 7<br>41.18%                      | 6<br>35.29%   | 5<br>29.41%   | 15<br>88.24%  | 14<br>82.35%  | 5<br>29.41%   | 2<br>11.76%   | 9<br>52.94%                  | 4<br>23.53%   | 13<br>76.47%  | 3<br>17.65%   | 0<br>0.00%   | 1<br>5.88%           | 10<br>58.82%  | 0<br>0.00%      | 4<br>23.53%  | 2<br>11.76%  | 2<br>11.76%   | 1<br>5.88%   | 0<br>0.00%   | 3<br>17.65%    | 0<br>0.00%                          | 0<br>0.00%              |
|                                                                                       | Total    |                                                              | 286<br>72.04%     | 153<br>38.54% | 38<br>9.57%                      | 177<br>44.58% | 145<br>36.52% | 90<br>22.67%  | 325<br>81.86% | 308<br>77.58% | 132<br>33.25% | 49<br>12.34%                 | 236<br>59.45% | 212<br>53.40% | 219<br>55.16% | 21<br>5.29%  | 38<br>9.57%          | 28<br>7.05%   | 264<br>66.50%   | 12<br>3.02%  | 87<br>21.91% | 25<br>6.30%   | 19<br>4.79%  | 43<br>10.83% | 26<br>6.55%    | 159<br>40.05%                       | 18<br>4.53%             |

p-value: 0.03

NHP recommendations by practice setting

|                                        |       | What NHPs do you recommend most often? Check all that apply. |                   |              |                                  |               |              |               |               |               |              |                              |               |               |             |              |                      |               |                 |              |              |               |              |              |                |                                     |                         |                |
|----------------------------------------|-------|--------------------------------------------------------------|-------------------|--------------|----------------------------------|---------------|--------------|---------------|---------------|---------------|--------------|------------------------------|---------------|---------------|-------------|--------------|----------------------|---------------|-----------------|--------------|--------------|---------------|--------------|--------------|----------------|-------------------------------------|-------------------------|----------------|
|                                        |       | Multivitamin/prenatal vitamin                                | Vitamin B complex | Vitamin B6   | Vitamin B12 (oral or sublingual) | Folic acid    | Vitamin C    | Vitamin D     | Calcium       | Magnesium     | Zinc         | Fish oil/omega-3 fatty acids | Melatonin     | Iron          | Ginseng     | Echinacea    | Homeopathic products | Probiotics    | St. John's wort | Cranberry    | Garlic       | Ginkgo biloba | Tea tree oil | Saw palmetto | Psyllium fiber | Weight loss/detoxification products | Other (please specify): | Total          |
| Please indicate your practice setting. | Rural | 69<br>68.32%                                                 | 38<br>37.62%      | 7<br>6.93%   | 50<br>49.50%                     | 39<br>38.61%  | 27<br>26.73% | 84<br>83.17%  | 82<br>81.19%  | 48<br>47.52%  | 21<br>20.79% | 56<br>55.45%                 | 58<br>57.43%  | 54<br>53.47%  | 8<br>7.92%  | 13<br>12.87% | 8<br>7.92%           | 78<br>77.23%  | 4<br>3.96%      | 23<br>22.77% | 13<br>12.87% | 5<br>4.95%    | 13<br>12.87% | 11<br>10.89% | 46<br>45.54%   | 6<br>5.94%                          | 9<br>8.91%              | 101<br>100.00% |
|                                        | Urban | 218<br>73.15%                                                | 116<br>38.93%     | 31<br>10.40% | 128<br>42.95%                    | 106<br>35.57% | 64<br>21.48% | 242<br>81.21% | 228<br>76.51% | 86<br>28.86%  | 28<br>9.40%  | 181<br>60.74%                | 154<br>51.68% | 167<br>56.04% | 13<br>4.36% | 26<br>8.72%  | 20<br>6.71%          | 187<br>62.75% | 8<br>2.68%      | 66<br>22.15% | 13<br>4.36%  | 15<br>5.03%   | 30<br>10.07% | 15<br>5.03%  | 114<br>38.26%  | 12<br>4.03%                         | 18<br>6.04%             | 298<br>100.00% |
|                                        | Total | 287<br>71.93%                                                | 154<br>38.60%     | 38<br>9.52%  | 178<br>44.61%                    | 145<br>36.34% | 91<br>22.81% | 326<br>81.70% | 310<br>77.69% | 134<br>33.58% | 49<br>12.28% | 237<br>59.40%                | 212<br>53.13% | 221<br>55.39% | 21<br>5.26% | 39<br>9.77%  | 28<br>7.02%          | 265<br>66.42% | 12<br>3.01%     | 89<br>22.31% | 26<br>6.52%  | 20<br>5.01%   | 43<br>10.78% | 26<br>6.52%  | 160<br>40.10%  | 18<br>4.51%                         | 27<br>6.77%             | 399<br>100.00% |

p-value: 0.02

## S3 File. Study results – Cross tabulations

### NHP recommendations by source of recommendation

|                                                                         |                                                        | What NHPs do you recommend most often? Check all that apply. |                   |             |                                  |               |              |               |               |               |              |                              |               |               |             |             |                      |               |                 |              |             |               |              |              |                |                                     |                         | Total          |
|-------------------------------------------------------------------------|--------------------------------------------------------|--------------------------------------------------------------|-------------------|-------------|----------------------------------|---------------|--------------|---------------|---------------|---------------|--------------|------------------------------|---------------|---------------|-------------|-------------|----------------------|---------------|-----------------|--------------|-------------|---------------|--------------|--------------|----------------|-------------------------------------|-------------------------|----------------|
|                                                                         |                                                        | Multivitamin/prenatal vitamin                                | Vitamin B complex | Vitamin B6  | Vitamin B12 (oral or sublingual) | Folic acid    | Vitamin C    | Vitamin D     | Calcium       | Magnesium     | Zinc         | Fish oil/omega-3 fatty acids | Melatonin     | Iron          | Ginseng     | Echinacea   | Homeopathic products | Probiotics    | St. John's wort | Cranberry    | Garlic      | Ginkgo biloba | Tea tree oil | Saw palmetto | Psyllium fiber | Weight loss/detoxification products | Other (please specify): |                |
| What is your primary basis for recommending NHPs to clients? Check one. | Health Canada approval of NHP                          | 39<br>81.25%                                                 | 23<br>49.2%       | 9<br>18.75% | 23<br>47.92%                     | 20<br>41.67%  | 16<br>33.33% | 39<br>81.25%  | 38<br>79.17%  | 19<br>39.58%  | 8<br>16.67%  | 28<br>58.33%                 | 26<br>54.17%  | 29<br>60.42%  | 4<br>8.33%  | 7<br>14.58% | 6<br>12.50%          | 32<br>66.67%  | 1<br>2.08%      | 15<br>31.25% | 3<br>6.25%  | 4<br>8.33%    | 3<br>6.25%   | 3<br>6.25%   | 13<br>27.08%   | 4<br>8.33%                          | 0<br>0.00%              | 48<br>100.00%  |
|                                                                         | Manufacturer information                               | 12<br>100.00%                                                | 2<br>83.33%       | 2<br>16.67% | 3<br>25.00%                      | 5<br>41.67%   | 6<br>25.00%  | 6<br>50.00%   | 6<br>50.00%   | 6<br>50.00%   | 3<br>25.00%  | 3<br>66.67%                  | 8<br>58.33%   | 7<br>41.67%   | 5<br>25.00% | 3<br>25.00% | 4<br>33.33%          | 10<br>83.33%  | 2<br>16.67%     | 4<br>33.33%  | 4<br>16.67% | 2<br>25.00%   | 3<br>25.00%  | 4<br>33.33%  | 2<br>16.67%    | 2<br>16.67%                         | 2<br>16.67%             | 12<br>100.00%  |
|                                                                         | Primary literature                                     | 32<br>58.18%                                                 | 18<br>32.73%      | 4<br>7.27%  | 19<br>34.55%                     | 18<br>32.73%  | 10<br>18.18% | 43<br>78.18%  | 33<br>60.00%  | 50<br>27.27%  | 15<br>20.00% | 27<br>49.09%                 | 26<br>47.27%  | 28<br>50.91%  | 1<br>1.82%  | 4<br>7.27%  | 3<br>5.45%           | 34<br>61.82%  | 0<br>0.00%      | 12<br>21.82% | 3<br>5.45%  | 1<br>1.82%    | 3<br>5.45%   | 5<br>5.45%   | 15<br>27.27%   | 2<br>3.64%                          | 8<br>14.55%             | 55<br>100.00%  |
|                                                                         | Review articles (i.e. Pharmacist's Letter, CPJ)        | 102<br>72.86%                                                | 49<br>35.00%      | 11<br>7.86% | 67<br>47.86%                     | 52<br>37.14%  | 28<br>19.00% | 123<br>87.86% | 119<br>81.43% | 44<br>31.43%  | 15<br>10.71% | 94<br>67.14%                 | 74<br>52.86%  | 77<br>55.00%  | 7<br>5.00%  | 12<br>8.57% | 6<br>4.29%           | 97<br>69.29%  | 6<br>4.29%      | 26<br>18.57% | 9<br>6.43%  | 8<br>5.71%    | 12<br>8.57%  | 4<br>2.9%    | 74<br>52.86%   | 3<br>2.14%                          | 7<br>5.00%              | 140<br>100.00% |
|                                                                         | Client request                                         | 71<br>76.34%                                                 | 42<br>45.16%      | 9<br>9.68%  | 36<br>38.71%                     | 32<br>32.26%  | 22<br>23.66% | 70<br>75.27%  | 77<br>82.80%  | 27<br>29.03%  | 6<br>6.45%   | 49<br>52.69%                 | 54<br>58.06%  | 51<br>54.84%  | 4<br>4.30%  | 9<br>9.68%  | 4<br>4.30%           | 57<br>61.29%  | 0<br>0.00%      | 21<br>22.58% | 1<br>1.08%  | 3<br>3.23%    | 16<br>17.20% | 5<br>5.38%   | 39<br>41.94%   | 2<br>2.15%                          | 5<br>5.38%              | 93<br>100.00%  |
|                                                                         | Recommendation/prescription from primary care provider | 21<br>67.74%                                                 | 8<br>25.81%       | 1<br>3.23%  | 14<br>58.08%                     | 14<br>45.16%  | 6<br>19.35%  | 30<br>96.77%  | 26<br>83.87%  | 12<br>38.71%  | 4<br>12.90%  | 17<br>54.84%                 | 16<br>51.61%  | 20<br>64.52%  | 2<br>6.45%  | 9<br>9.68%  | 3<br>12.90%          | 23<br>74.19%  | 3<br>9.68%      | 8<br>25.81%  | 4<br>12.90% | 6<br>4.45%    | 2<br>6.45%   | 9<br>9.68%   | 3<br>35.48%    | 2<br>6.45%                          | 1<br>3.23%              | 31<br>100.00%  |
|                                                                         | Internet/social media                                  | 1<br>50.00%                                                  | 0<br>0.00%        | 0<br>0.00%  | 1<br>50.00%                      | 1<br>50.00%   | 1<br>50.00%  | 2<br>100.00%  | 0<br>0.00%    | 0<br>0.00%    | 0<br>0.00%   | 1<br>50.00%                  | 0<br>0.00%    | 0<br>0.00%    | 0<br>0.00%  | 0<br>0.00%  | 0<br>0.00%           | 1<br>50.00%   | 0<br>0.00%      | 0<br>0.00%   | 0<br>0.00%  | 0<br>0.00%    | 0<br>0.00%   | 0<br>0.00%   | 0<br>0.00%     | 0<br>0.00%                          | 0<br>0.00%              | 2<br>100.00%   |
|                                                                         | Other (please specify):                                | 9<br>50.00%                                                  | 4<br>22.22%       | 1<br>11.11% | 11<br>61.11%                     | 5<br>27.78%   | 5<br>27.78%  | 13<br>72.22%  | 11<br>61.11%  | 11<br>61.11%  | 2<br>11.11%  | 13<br>72.22%                 | 9<br>50.00%   | 11<br>61.11%  | 0<br>0.00%  | 1<br>5.56%  | 1<br>5.56%           | 11<br>61.11%  | 0<br>0.00%      | 3<br>16.67%  | 2<br>11.11% | 0<br>0.00%    | 4<br>22.22%  | 3<br>16.67%  | 4<br>22.22%    | 3<br>16.67%                         | 2<br>11.11%             | 18<br>100.00%  |
|                                                                         | Total                                                  | 287<br>71.93%                                                | 154<br>38.60%     | 38<br>9.52% | 178<br>44.61%                    | 145<br>36.34% | 91<br>22.81% | 326<br>81.70% | 310<br>77.69% | 134<br>33.58% | 42<br>10.28% | 237<br>59.40%                | 212<br>53.13% | 221<br>55.39% | 21<br>5.26% | 39<br>9.77% | 28<br>7.02%          | 265<br>66.42% | 12<br>3.01%     | 89<br>22.31% | 26<br>6.52% | 20<br>5.01%   | 43<br>10.78% | 62<br>15.62% | 160<br>40.10%  | 18<br>4.51%                         | 27<br>6.77%             | 399<br>100.00% |

**p-value: 0.00**

NHP recommendations by NHP learning

|                                                                                                                            |                    | What NHPs do you recommend most often? Check all that apply. |                   |              |                                  |               |              |               |               |               |              |                              |               |               |             |              |                      |               |                 |              |             |               |              |              |                |                                     | Total       |                         |
|----------------------------------------------------------------------------------------------------------------------------|--------------------|--------------------------------------------------------------|-------------------|--------------|----------------------------------|---------------|--------------|---------------|---------------|---------------|--------------|------------------------------|---------------|---------------|-------------|--------------|----------------------|---------------|-----------------|--------------|-------------|---------------|--------------|--------------|----------------|-------------------------------------|-------------|-------------------------|
|                                                                                                                            |                    | Multivitamin/prenatal vitamin                                | Vitamin B complex | Vitamin B6   | Vitamin B12 (oral or sublingual) | Folic acid    | Vitamin C    | Vitamin D     | Calcium       | Magnesium     | Zinc         | Fish oil/omega-3 fatty acids | Melatonin     | Iron          | Ginseng     | Echinacea    | Homeopathic products | Probiotics    | St. John's wort | Cranberry    | Garlic      | Ginkgo biloba | Tea tree oil | Saw palmetto | Psyllium fiber | Weight loss/detoxification products |             | Other (please specify): |
| Please indicate the number of hours you have spent on accredited and non-accredited NHP learning within the past two years | None               | 40<br>70.18%                                                 | 19<br>33.33%      | 2<br>3.51%   | 21<br>36.84%                     | 12<br>21.05%  | 12<br>21.05% | 40<br>70.18%  | 38<br>66.67%  | 12<br>21.05%  | 5<br>8.77%   | 26<br>45.61%                 | 27<br>47.37%  | 31<br>54.39%  | 1<br>1.75%  | 4<br>7.02%   | 5<br>8.77%           | 36<br>63.16%  | 2<br>3.51%      | 12<br>21.05% | 1<br>1.75%  | 1<br>1.75%    | 4<br>7.02%   | 2<br>3.51%   | 13<br>22.81%   | 2<br>3.51%                          | 6<br>10.53% | 57<br>100.00%           |
|                                                                                                                            | 1 to 3 hours       | 97<br>71.85%                                                 | 50<br>37.04%      | 16<br>11.85% | 63<br>46.67%                     | 54<br>40.00%  | 24<br>17.78% | 112<br>82.96% | 106<br>78.52% | 40<br>29.63%  | 12<br>8.89%  | 75<br>55.56%                 | 70<br>51.85%  | 81<br>60.00%  | 8<br>5.93%  | 13<br>9.63%  | 4<br>2.96%           | 86<br>63.70%  | 3<br>2.22%      | 26<br>19.26% | 9<br>6.67%  | 8<br>5.93%    | 10<br>7.41%  | 8<br>5.93%   | 59<br>43.70%   | 6<br>4.44%                          | 5<br>3.70%  | 135<br>100.00%          |
|                                                                                                                            | 4 to 6 hours       | 55<br>71.43%                                                 | 28<br>36.36%      | 7<br>9.09%   | 39<br>50.65%                     | 30<br>38.96%  | 17<br>22.08% | 62<br>80.52%  | 63<br>81.82%  | 20<br>25.97%  | 4<br>5.19%   | 50<br>64.94%                 | 41<br>53.25%  | 42<br>54.55%  | 2<br>2.60%  | 4<br>5.19%   | 4<br>5.19%           | 48<br>62.34%  | 0<br>0.00%      | 15<br>19.48% | 3<br>3.90%  | 3<br>3.90%    | 8<br>10.39%  | 3<br>3.90%   | 30<br>38.96%   | 3<br>3.90%                          | 5<br>6.49%  | 77<br>100.00%           |
|                                                                                                                            | 7 to 10 hours      | 15<br>65.22%                                                 | 10<br>43.48%      | 5<br>21.74%  | 11<br>47.83%                     | 9<br>39.13%   | 10<br>43.48% | 20<br>86.96%  | 20<br>86.96%  | 11<br>47.83%  | 7<br>30.43%  | 15<br>65.22%                 | 17<br>73.91%  | 15<br>65.22%  | 0<br>0.00%  | 3<br>13.04%  | 4<br>17.39%          | 14<br>60.87%  | 3<br>13.04%     | 9<br>39.13%  | 3<br>13.04% | 0<br>0.00%    | 8<br>34.78%  | 4<br>17.39%  | 10<br>43.48%   | 1<br>4.35%                          | 2<br>8.70%  | 23<br>100.00%           |
|                                                                                                                            | More than 10 hours | 80<br>75.47%                                                 | 46<br>43.40%      | 8<br>7.55%   | 44<br>41.51%                     | 40<br>37.74%  | 28<br>26.42% | 91<br>85.85%  | 83<br>78.30%  | 51<br>48.11%  | 21<br>19.81% | 71<br>66.98%                 | 56<br>52.83%  | 52<br>49.06%  | 10<br>9.43% | 15<br>14.15% | 11<br>10.38%         | 80<br>75.47%  | 4<br>3.77%      | 27<br>25.47% | 10<br>9.43% | 8<br>7.55%    | 13<br>12.26% | 9<br>8.49%   | 48<br>45.28%   | 6<br>5.66%                          | 9<br>8.49%  | 106<br>100.00%          |
| Total                                                                                                                      |                    | 287<br>72.11%                                                | 153<br>38.44%     | 38<br>9.55%  | 178<br>44.72%                    | 145<br>36.43% | 91<br>22.86% | 325<br>81.66% | 310<br>77.89% | 134<br>33.67% | 49<br>12.31% | 237<br>59.55%                | 211<br>53.02% | 221<br>55.53% | 21<br>5.28% | 39<br>9.80%  | 28<br>7.04%          | 264<br>66.33% | 12<br>3.02%     | 89<br>22.36% | 26<br>6.53% | 20<br>5.03%   | 43<br>10.80% | 26<br>6.53%  | 160<br>40.20%  | 18<br>4.52%                         | 27<br>6.78% | 398<br>100.00%          |

p-value: 0.01
